# Supplementary material for: Can Pulsed Electromagnetic Fields Trigger On-Demand Drug Release from High-Tm Magnetoliposomes?
Source: PubMed Central journal article supplement (PMC5923526; doi:10.3390/nano8040196), 2018-03-27
Supplement: nanomaterials-08-00196-s001.pdf [file nanomaterials-08-00196-s001.pdf]

Supplementary information

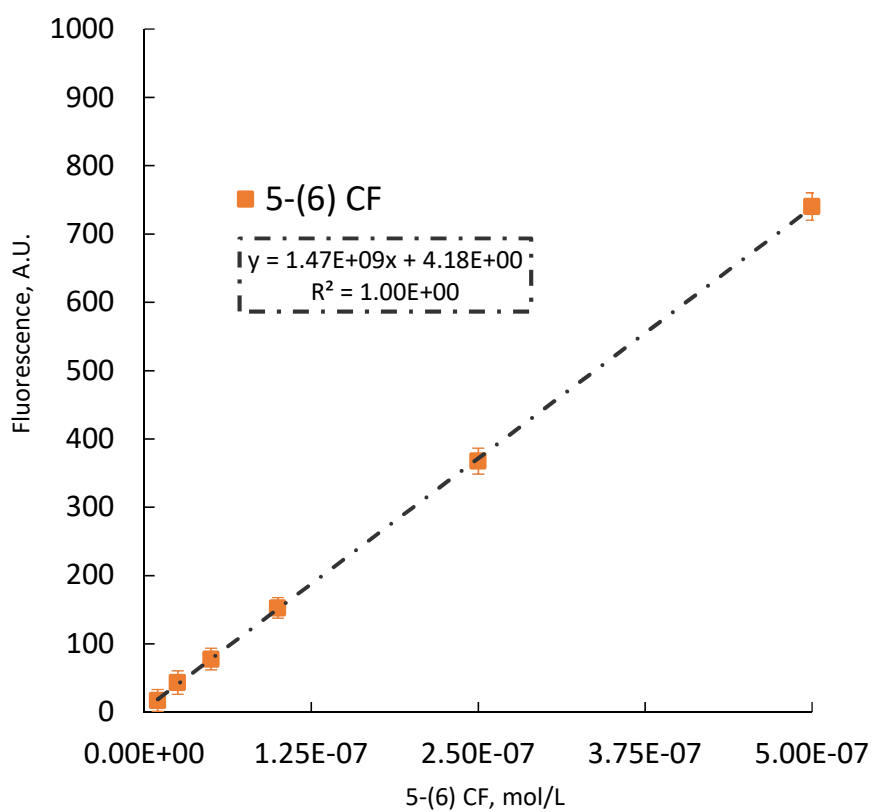

**Figure SI.** Calibration curve of 5-(6) CF with the linear regression mentioned in Figure 4.
